# Supplementary material
Source: PubMed Central journal article supplement (PMC9912044)
Supplement: sj-pdf-1-prf-10.1177_02676591231156487.pdf [file sj-pdf-1-prf-10.1177_02676591231156487.pdf]

**Supplement Table 1: Patients Characteristics comparing Low to High Body Mass Index**

patients at time of Venovenous ECMO initiation. (BMI Threshold of 35 kg/m<sup>2</sup>)

|                                                                                                                                            | Study<br>Population<br>(N=354) | Low BMI ( $\leq 35$<br>kg/m <sup>2</sup> )<br>(N=264) | High BMI ( $> 35$<br>kg/m <sup>2</sup> )<br>(N=90) |
|--------------------------------------------------------------------------------------------------------------------------------------------|--------------------------------|-------------------------------------------------------|----------------------------------------------------|
| Age, years                                                                                                                                 | 52 (43-60)                     | 54 (46-61)                                            | 48 (38-58)                                         |
| Sex                                                                                                                                        |                                |                                                       |                                                    |
| Male                                                                                                                                       | 250 (71%)                      | 201 (76%)                                             | 49 (54%)                                           |
| Female                                                                                                                                     | 104 (29%)                      | 63 (24%)                                              | 41 (46%)                                           |
| Race/Ethnicity                                                                                                                             |                                |                                                       |                                                    |
| White                                                                                                                                      | 154 (44%)                      | 127 (48%)                                             | 27 (30%)                                           |
| Hispanic                                                                                                                                   | 74 (21%)                       | 54 (21%)                                              | 20 (22%)                                           |
| Asian                                                                                                                                      | 44 (12%)                       | 38 (14%)                                              | 6 (7%)                                             |
| Black                                                                                                                                      | 35 (10%)                       | 13 (5%)                                               | 22 (24%)                                           |
| Others                                                                                                                                     | 47 (13%)                       | 32 (12%)                                              | 15 (17%)                                           |
| BMI (kg/m <sup>2</sup> )                                                                                                                   | 30 (26-35)                     | 28 (25-31)                                            | 39 (37-43)                                         |
| Acute Physiology Score II                                                                                                                  | 18 (11-24)                     | 19 (11-24)                                            | 16 (10-23)                                         |
| Sequential Organ-Function Assessment<br>(SOFA)                                                                                             | 7 (5-10)                       | 7 (5-10)                                              | 7 (5-9)                                            |
| Pregnancy                                                                                                                                  | 6(2%)                          | 3 (1%)                                                | 3 (3%)                                             |
| Co-morbidities                                                                                                                             |                                |                                                       |                                                    |
| Immunocompromised or transplant<br>patient                                                                                                 | 12 (3%)                        | 10 (4%)                                               | 2 (2%)                                             |
| Hypertension                                                                                                                               | 153 (43%)                      | 115 (44%)                                             | 38 (42%)                                           |
| Diabetes                                                                                                                                   | 88 (25%)                       | 61 (23%)                                              | 27 (30%)                                           |
| Active Smoker                                                                                                                              | 64 (18%)                       | 51 (19%)                                              | 13 (14%)                                           |
| Chronic pulmonary disease                                                                                                                  | 22 (6%)                        | 15 (6%)                                               | 7 (8%)                                             |
| Chronic cardiac disease                                                                                                                    | 21 (6%)                        | 16 (6%)                                               | 5 (6%)                                             |
| Chronic kidney disease                                                                                                                     | 13 (4%)                        | 12 (5%)                                               | 1 (1%)                                             |
| Alcohol abuse                                                                                                                              | 10 (3%)                        | 5 (2%)                                                | 5 (6%)                                             |
| Malignancy                                                                                                                                 | 8 (2%)                         | 5 (2%)                                                | 3 (3%)                                             |
| Time from first symptoms to<br>hospital admission, d                                                                                       | 10 (6-16)                      | 10 (6-16)                                             | 9 (4-13)                                           |
| Time from intubation to ECMO, d                                                                                                            | 4(2-7)                         | 4 (2-8)                                               | 4 (2-6)                                            |
| Duration of mechanical ventilation, d                                                                                                      | 24 (14-38)                     | 27 (16-42)                                            | 18 (10-32)                                         |
| Hospital length of stay, d                                                                                                                 | 32 (17-50)                     | 32 (20-56)                                            | 29 (16-37 )                                        |
| Intensive Care Unit length of stay, d                                                                                                      | 28 (16-44)                     | 31 (18-48)                                            | 24 (14-34)                                         |
| Summary Statistics are median (inter-quartile range) or n (%). ECMO = Extracorporeal Membrane Oxygenation, BMI = Body Mass Index, d = days |                                |                                                       |                                                    |

**Supplemental Table 2:** Patients pre-ECMO respiratory support characteristics and post-ECMO outcomes, grouped by Body Mass Index

|                                                                                                                                                                       | Study<br>Population<br>(N=354) | Low BMI ( $\leq 35$<br>kg/m <sup>2</sup> )<br>(N=264) | High BMI ( $> 35$<br>kg/m <sup>2</sup> )<br>(N=90) |
|-----------------------------------------------------------------------------------------------------------------------------------------------------------------------|--------------------------------|-------------------------------------------------------|----------------------------------------------------|
| Ventilatory parameters                                                                                                                                                |                                |                                                       |                                                    |
| FiO <sub>2</sub>                                                                                                                                                      | 100 %                          | 100%                                                  | 100%                                               |
| PEEP, cm H <sub>2</sub> O                                                                                                                                             | 12 (10-15)                     | 12 (10-14)                                            | 12 (10-16)                                         |
| Static compliance, mL/cm H <sub>2</sub> O                                                                                                                             | 25 (19-33)                     | 26 (20-34)                                            | 22 (16-28)                                         |
| PaO <sub>2</sub> /FiO <sub>2</sub>                                                                                                                                    | 86 (63-127)                    | 90 (65-134)                                           | 77 (61-105)                                        |
| PaCO <sub>2</sub>                                                                                                                                                     | 50 (40-60)                     | 49 (39-61)                                            | 51 (45-60)                                         |
| Pre-ECMO Prone positioning                                                                                                                                            | 211 (60%)                      | 162 (61%)                                             | 49 (54%)                                           |
| Duration of mechanical ventilation, d                                                                                                                                 | 24 (14-38)                     | 26 (16-42)                                            | 17 (10-32)                                         |
| Duration on ECMO, d                                                                                                                                                   | 16 (8-28)                      | 18 (8-29)                                             | 14 (8-25)                                          |
| Hospital length of stay, d                                                                                                                                            | 32 (18-52)                     | 32 (20-56)                                            | 29 (16-37)                                         |
| Intensive Care Unit length of stay, d                                                                                                                                 | 28 (18-46)                     | 30 (18-48)                                            | 24 (14-34)                                         |
| Data are median (inter-quartile range) or n (%). ECMO = Extracorporeal Membrane Oxygenation, PEEP = Positive End-Expiratory Pressure, BMI = Body Mass Index, d = days |                                |                                                       |                                                    |

Supplemental Table 3: Outcomes on VV ECMO, (threshold 35 kg/m<sup>2</sup>)

| Outcome                                         | Study Population (N=354) | Low BMI ( $\leq 35$ kg/m <sup>2</sup> ) (N=264) | High BMI ( $> 35$ kg/m <sup>2</sup> ) (N=90) |
|-------------------------------------------------|--------------------------|-------------------------------------------------|----------------------------------------------|
| Discharged home or to other facilities          | 136 (39%)                | 97 (37%)                                        | 39 (43%)                                     |
| Remain in the hospital                          | 75 (21%)                 | 63 (24%)                                        | 12 (14%)                                     |
| In-hospital death                               | 143 (40%)                | 104 (39%)                                       | 39 (43%)                                     |
| Data are N (%), BMI = Body Mass Index, d = days |                          |                                                 |                                              |

Supplemental Table 4: Estimated Risk of Death and Discharge, (threshold BMI >35 kg/m<sup>2</sup>)

| Variable                    | Death |              | Discharge |              |
|-----------------------------|-------|--------------|-----------|--------------|
|                             | HR    | 95% CI       | HR        | 95% CI       |
| Age (+10 years)             | 1.38  | 1.17 to 1.63 | 0.73      | 0.63 to 0.85 |
| Time on ECMO (+1 month)     | 1.06  | 1.01 to 1.10 | 0.83      | 0.77 to 0.89 |
| Male Sex                    | 1.12  | 0.79 to 1.58 | 0.89      | 0.62 to 1.28 |
| BMI (+5 kg/m <sup>2</sup> ) | 1.09  | 0.97 to 1.22 | 1.00      | 0.90 to 1.10 |
| APACHE II Score < 18        | 1.13  | 0.71 to 1.80 | 1.30      | 0.81 to 2.10 |

ECMO = Extracorporeal Membrane Oxygenation, BMI = Body Mass Index, Acute Physiologic Assessment and Chronic Health Evaluation II Score = APACHE II Score, HR = Hazard Ratio, CI = Confidence Interval. *\*The median APACHE II score was 18.*

**Supplement Table 5: Number of patients per country**

| Country       | All patients | Low BMI ( $\leq 35 \text{ kg/m}^2$ ) | High BMI ( $> 35 \text{ kg/m}^2$ ) |
|---------------|--------------|--------------------------------------|------------------------------------|
| United States | 134          | 82                                   | 52                                 |
| Italy         | 64           | 54                                   | 10                                 |
| Belgium       | 17           | 13                                   | 4                                  |
| Colombia      | 21           | 17                                   | 4                                  |
| Germany       | 18           | 15                                   | 3                                  |
| Portugal      | 15           | 13                                   | 2                                  |
| Japan         | 14           | 13                                   | 1                                  |
| Spain         | 11           | 10                                   | 1                                  |
| Chile         | 5            | 3                                    | 2                                  |
| Kuwait        | 7            | 5                                    | 2                                  |
| South Korea   | 7            | 6                                    | 1                                  |
| Austria       | 7            | 6                                    | 1                                  |
| Canada        | 7            | 6                                    | 1                                  |
| Indonesia     | 6            | 5                                    | 1                                  |
| Estonia       | 4            | 3                                    | 1                                  |
| Mexico        | 4            | 2                                    | 2                                  |
| Qatar         | 2            | 1                                    | 1                                  |
| South Africa  | 1            | 0                                    | 1                                  |
| Brazil        | 3            | 3                                    | 0                                  |
| Ireland       | 3            | 3                                    | 0                                  |
| Argentina     | 1            | 1                                    | 0                                  |
| Poland        | 1            | 1                                    | 0                                  |
| Singapore     | 1            | 1                                    | 0                                  |
| Taiwan        | 1            | 1                                    | 0                                  |
| <b>Total</b>  | <b>354</b>   | <b>264</b>                           | <b>90</b>                          |

Data are absolute numbers
